# Supplementary material
Source: Springer Nature journal article supplement (https://www.springermedizin.de/resource/supplementary/13000_2011_361_MOESM3_ESM.pdf/9624430)

# Mean Claudin-3 Staining Intensity by Carcinoma Stage

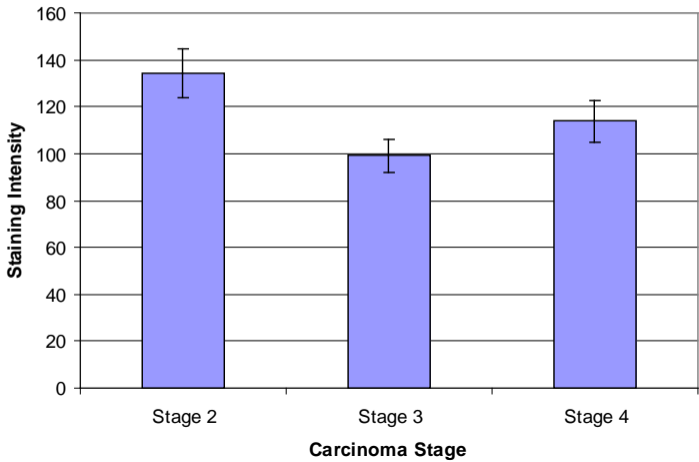

Supplement: MOESM3 [file 9624430]
